# Supplementary material for: Emotional Distress in Portuguese Cancer Patients: The Use of the Emotion Thermometers (ET) Screening Tool
Source: MDPI journal article supplement (doi:10.3390/healthcare11192689), 2023-10-06
Supplement: s1 [file s1]

## Supplementary Materials

**Table S1.** Unadjusted generalized linear model results for the univariate relationship between patient characteristics, problem list, and distress.

|                       | Distress    |           |
|-----------------------|-------------|-----------|
|                       | Coefficient | Std. Err. |
| <b>Demographic</b>    |             |           |
| Age [mean (SD)]       | 0.00        | 0.00      |
| Female                | 0.12***     | 0.03      |
| <b>Disease phase</b>  |             |           |
| Treatment             | Ref.        |           |
| Survival              | -0.01       | 0.03      |
| Palliative            | 0.07        | 0.04      |
| Diagnosis             | 0.05        | 0.04      |
| Relapse               | 0.12***     | 0.05      |
| <b>Practical</b>      |             |           |
| Housing               | 0.11***     | 0.03      |
| Security              | 0.13***     | 0.03      |
| Work/school           | 0.09***     | 0.02      |
| Transportation        | 0.07        | 0.04      |
| Childcare             | 0.06        | 0.05      |
| <b>Family</b>         |             |           |
| Dealing with partner  | 0.08***     | 0.02      |
| Dealing with children | 0.10***     | 0.02      |
| <b>Emotional</b>      |             |           |
| Worry                 | 0.26***     | 0.07      |
| Fear                  | 0.18***     | 0.03      |
| Sadness               | 0.37***     | 0.04      |
| Depression            | 0.27***     | 0.02      |
| Nervousness           | 0.18***     | 0.03      |
| <b>Spiritual</b>      |             |           |
| Relating to God       | 0.10***     | 0.03      |
| Loss of Faith         | 0.15***     | 0.03      |
| <b>Physical</b>       |             |           |
| Pain                  | 0.12***     | 0.02      |
| Nausea                | 0.09***     | 0.02      |
| Fatigue               | 0.12***     | 0.03      |
| Sleep                 | 0.14***     | 0.02      |
| Getting around        | 0.09***     | 0.02      |
| Bathing/dressing      | 0.13***     | 0.03      |
| Breathing             | 0.15***     | 0.02      |
| Mouth sores           | 0.02        | 0.03      |
| Eating                | 0.14***     | 0.02      |
| Indigestion           | 0.09***     | 0.03      |
| Constipation          | 0.10***     | 0.02      |
| Diarrhoea             | 0.04        | 0.03      |

|                                                         | Distress    |           |
|---------------------------------------------------------|-------------|-----------|
|                                                         | Coefficient | Std. Err. |
| Changes in urination                                    | 0.07**      | 0.03      |
| Fevers                                                  | -0.06       | 0.08      |
| Dry/itchy skin                                          | 0.04        | 0.02      |
| Dry/congested nose                                      | 0.03        | 0.03      |
| Tingling in hands/feet                                  | 0.05**      | 0.02      |
| Feeling swollen                                         | 0.08***     | 0.02      |
| Sexual                                                  | 0.03        | 0.02      |
| <b>Other</b>                                            |             |           |
| Economic difficulties                                   | 0.11***     | 0.02      |
| Legal problems                                          | 0.12***     | 0.03      |
| Communication with health professionals                 | 0.10***     | 0.03      |
| Body image concerns                                     | 0.11***     | 0.02      |
| Difficulties in obtaining information about the disease | 0.09***     | 0.03      |

Note: \*\*p<0.05; \*\*\*p<0.01

**Table S2.** Generalized linear model results for the relationship between patient characteristics and problem list, and distress.

|                                         | Distress    |           |
|-----------------------------------------|-------------|-----------|
|                                         | Coefficient | Std. Err. |
| <b>Demographics</b>                     |             |           |
| Female                                  | 0.09***     | 0.03      |
| <b>Disease phase</b>                    |             |           |
| Treatment                               | Ref.        |           |
| Survival                                | 0.00        | 0.03      |
| Diagnosis                               | 0.08        | 0.04      |
| Relapse                                 | 0.06        | 0.04      |
| Palliative                              | 0.18***     | 0.06      |
| <b>Practical</b>                        |             |           |
| Housing                                 | 0.03        | 0.03      |
| Security                                | 0.01        | 0.03      |
| Work/school                             | 0.03        | 0.02      |
| <b>Family</b>                           |             |           |
| Dealing with partner                    | 0.03        | 0.02      |
| Dealing with children                   | 0.05        | 0.02      |
| <b>Emotional</b>                        |             |           |
| Worry                                   | 0.11        | 0.07      |
| Fears                                   | 0.02        | 0.04      |
| Sadness                                 | 0.22***     | 0.05      |
| Depression                              | 0.16***     | 0.02      |
| Nervousness                             | 0.04        | 0.03      |
| <b>Spiritual</b>                        |             |           |
| Relating to God                         | 0.01        | 0.03      |
| Loss of Faith                           | 0.04        | 0.03      |
| <b>Physical</b>                         |             |           |
| Pain                                    | 0.01        | 0.03      |
| Nausea                                  | 0.02        | 0.02      |
| Fatigue                                 | -0.02       | 0.03      |
| Sleep                                   | 0.08***     | 0.02      |
| Getting around                          | -0.02       | 0.03      |
| Bathing/dressing                        | 0.05        | 0.03      |
| Breathing                               | 0.09***     | 0.03      |
| Eating                                  | 0.05        | 0.03      |
| Indigestion                             | -0.03       | 0.03      |
| Constipation                            | 0.01        | 0.02      |
| Changes in urination                    | 0.03        | 0.03      |
| Tingling in hands/feet                  | -0.05       | 0.03      |
| Feeling swollen                         | -0.04       | 0.02      |
| Economic difficulties                   | 0.01        | 0.03      |
| Legal problems                          | 0.05        | 0.04      |
| Communication with health professionals | 0.03        | 0.03      |
| Body image concerns                     | 0.01        | 0.02      |

|                                                         | Distress    |           |
|---------------------------------------------------------|-------------|-----------|
|                                                         | Coefficient | Std. Err. |
| Difficulties in obtaining information about the disease | 0.00        | 0.03      |

Note: \*\*\*p<0.01

**Table S3.** Generalized linear model results for the relationship between patient characteristics and problem list (excluding emotional problems), and distress.

|                                                         | Distress    |           |
|---------------------------------------------------------|-------------|-----------|
|                                                         | Coefficient | Std. Err. |
| <b>Demographics</b>                                     |             |           |
| Female                                                  | 0.10***     | 0.03      |
| <b>Disease phase</b>                                    |             |           |
| Treatment                                               | Ref.        |           |
| Survival                                                | -0.01       | 0.03      |
| Diagnosis                                               | 0.09**      | 0.04      |
| Relapse                                                 | 0.06        | 0.04      |
| Palliative                                              | 0.14***     | 0.05      |
| <b>Practical</b>                                        |             |           |
| Housing                                                 | 0.02        | 0.03      |
| Security                                                | 0.05        | 0.03      |
| Work/school                                             | 0.05**      | 0.02      |
| <b>Family</b>                                           |             |           |
| Dealing with partner                                    | 0.03        | 0.02      |
| Dealing with children                                   | 0.06**      | 0.03      |
| <b>Spiritual</b>                                        |             |           |
| Relating to God                                         | 0.01        | 0.04      |
| Loss of Faith                                           | 0.07**      | 0.03      |
| <b>Physical</b>                                         |             |           |
| Pain                                                    | 0.03        | 0.03      |
| Nausea                                                  | 0.03        | 0.02      |
| Fatigue                                                 | 0.03        | 0.03      |
| Sleep                                                   | 0.10***     | 0.03      |
| Getting around                                          | -0.01       | 0.03      |
| Bathing/dressing                                        | 0.06        | 0.03      |
| Breathing                                               | 0.08***     | 0.03      |
| Eating                                                  | 0.07**      | 0.03      |
| Indigestion                                             | -0.02       | 0.03      |
| Constipation                                            | 0.03        | 0.02      |
| Changes in urination                                    | 0.03        | 0.03      |
| Tingling in hands/feet                                  | -0.05       | 0.03      |
| Feeling swollen                                         | -0.02       | 0.03      |
| Economic difficulties                                   |             |           |
| Legal problems                                          | 0.03        | 0.03      |
| Communication with health professionals                 | 0.03        | 0.04      |
| Body image concerns                                     | 0.04**      | 0.03      |
| Difficulties in obtaining information about the disease | 0.05        | 0.02      |

Note: \*\* $p < 0.05$ ; \*\*\* $p < 0.01$
